# Supplementary material for: Quality and Safety Assessment of Edible Seaweeds Alaria esculenta and Saccharina latissima Cultivated in Scotland
Source: MDPI journal article supplement (doi:10.3390/foods10092210), 2021-09-17
Supplement: s1 [file s1]

Supplementary data:

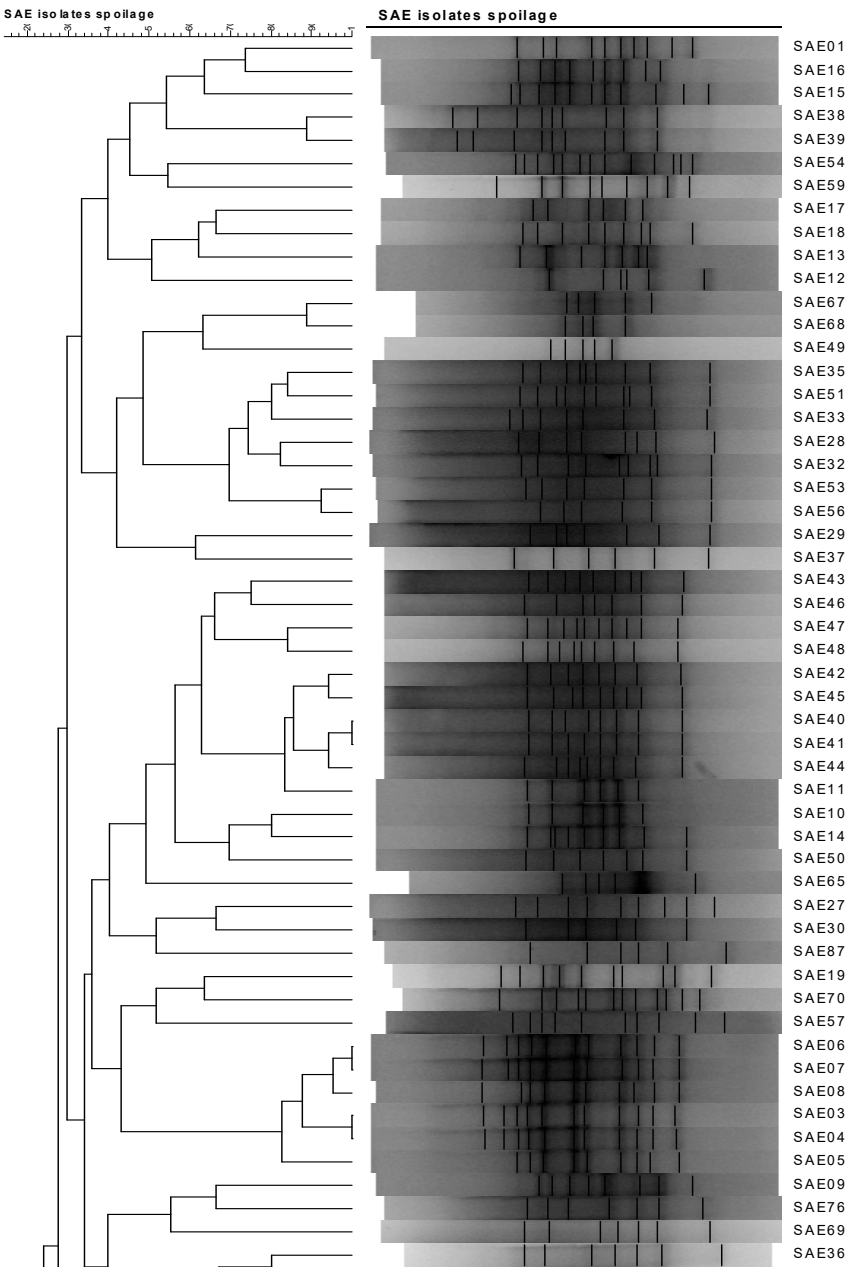

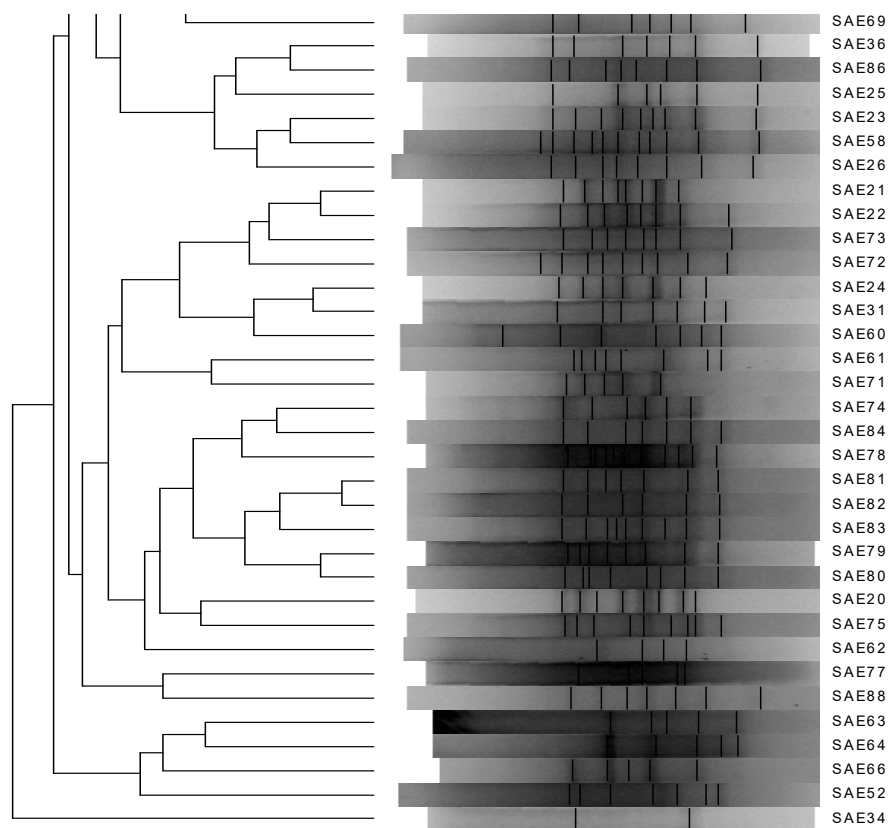

**Figure S1.** RAPD-PCR clustering of bacteria isolated from *A. esculenta* (fingerprints analyzed with Dice coefficient and dendrogram constructed with UPGMA)

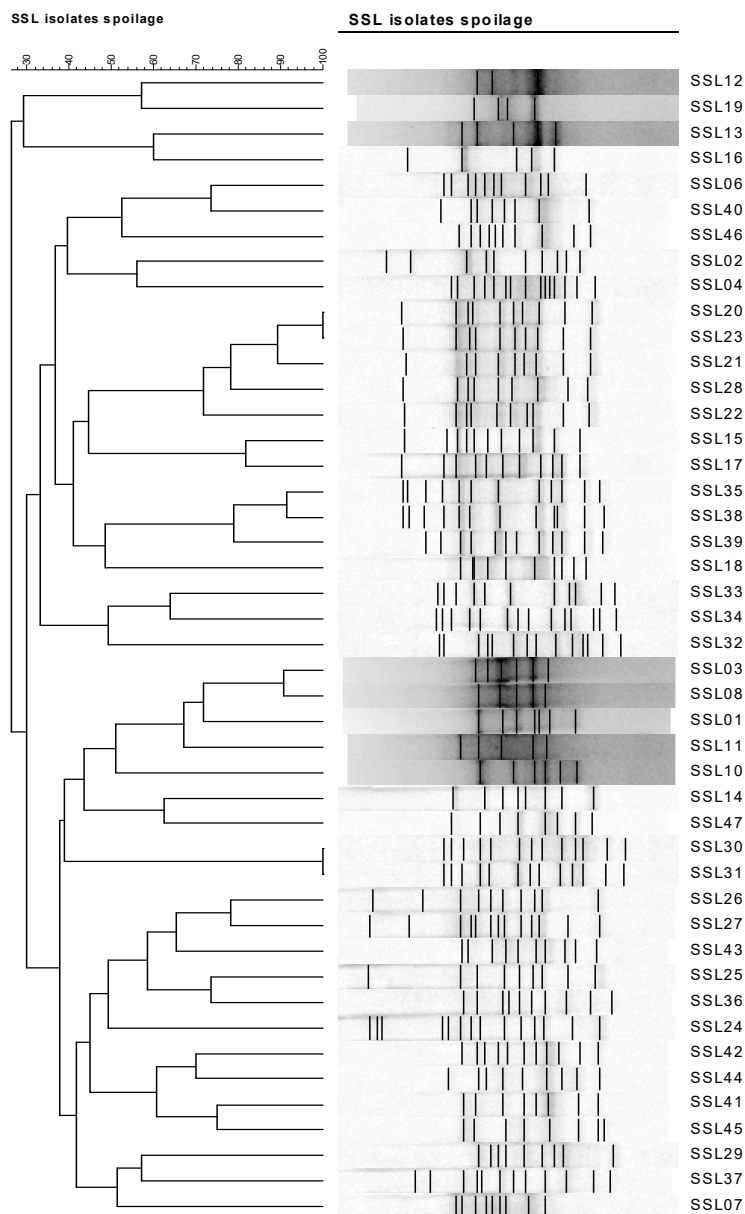

**Figure S2.** RAPD-PCR clustering of bacteria isolated from *S. latissima* (fingerprints analyzed with Dice coefficient and dendrogram constructed with UPGMA)
